# Supplementary material for: Design and feasibility of an implementation strategy to address Chagas guidelines engagement at the primary healthcare level in Argentina: a pilot study
Source: Research Square preprint supplement (doi:10.21203/rs.3.rs-1427996/v1), 2022-06-01
Supplement: Supplementary file 1 [file c3d828d5cf2bc4efc9c6c2f4.docx]

**Legend for Additional files 1-6**

These materials were developed after extensive formative research, working with designers and researchers from different disciplines, and are the fundamental components of the implementation strategy. It was all produced by the research team based on the information and recommendations of the national Chagas guide, which is similar to Chagas guidelines from other regions of Latin America.
